# Supplementary material
Source: PubMed Central journal article supplement (PMC4002958)
Supplement: cmi201042x1.pdf [file cmi201042x1.pdf]

**Supplemental Table 1 Primers used for SSP-PCR**

| Primer              | Location | Sequence (5'–3')         | Application                                                                   | Reference |
|---------------------|----------|--------------------------|-------------------------------------------------------------------------------|-----------|
| KIR3DL1_For         | Exon 4   | CCATCGGTCCCATGATGCT      | <i>KIR3DL1/KIR3DS1</i> SSP-PCR genotyping                                     | 53        |
| KIR3DL1_Rev         | Exon 5   | GCTGAGAGAGAAGTTTCTCATATG |                                                                               | —         |
| KIR3DS1_For         | Exon 3   | GGCAGAATATTCCAGGAGG      |                                                                               | 53        |
| KIR3DS1_Rev         | Exon 4   | AGGGGTCCTTAGAGATCCA      |                                                                               | 53        |
| KIR3DL1_DS1_For2    | Exon 3   | TCTTCGGTGCTACTATCRTCATA  | Independent <i>KIR3DL1/KIR3DS1</i> SSP-PCR genotyping                         | —         |
| KIR3DL1_Rev3        | Exon 3   | TTCCTGTGACCATGATCACGAC   |                                                                               | —         |
| KIR3DS1_Rev3        | Exon 3   | TTCCTGTGACCATGATCACGAT   |                                                                               | —         |
| KIR3DL1_For3        | Exon 3   | ATGGCAGAWTATTCCAGGTGA    | <i>KIR3DL1-Leu86/Ser86</i> genotyping: the amplification product              | —         |
| KIR3DL1_Leu86Rev    | Exon 3   | GGGGTTGCTGGGTGACA        | <i>KIR3DL1_DS1_For2</i> – <i>KIR3DL1_Rev3</i> is used as a template for the   | —         |
| KIR3DL1_Ser86Rev    | Exon 3   | GGGGTTGCTGGGTGACG        | nested SSP-PCR                                                                | —         |
| KIR3DL1_001/005 For | Exon 4   | CGGTCCCATGATGCTGGC       | <i>KIR3DL1*005</i> genotyping: the amplification product <i>KIR3DL1_For</i> – | —         |
| KIR3DL1_005 Rev     | Exon 4   | ACTGGGAGCTGACAACATGATGA  | <i>KIR3DL1_Rev</i> is used as a template for the nested                       | —         |
| KIR3DL1_001 Rev     | Exon 4   | ACTGGGAGCTGACAACATGATGG  | SSP-PCR                                                                       | —         |
| KIR3DL1_1150D       | Exon 7   | CTGCAGGGAACAGAACATCC     | <i>KIR3DL1*007</i> genotyping: the amplification product                      | —         |
| KIR3DL1_1280R       | Exon 8   | CATTGGAAGTTCCGTGTAGAA    | <i>KIR3DL1_1150D</i> – <i>KIR3DL1_1280R</i> is used as a template for the     | —         |
| KIR3DL1_1155D       | Exon 7   | GGAACAGAACAGCCAACAGC     | nested SSP-PCR with <i>KIR_3DL1_1155D</i> and <i>KIR_3DL1_007R</i>            | —         |
| KIR3DL1_007R        | Exon 8   | CGCAGTGATCCAACGTCCA      | or with <i>KIR_3DL1_1155D</i> and <i>KIR_3DL1_001R1200-2</i> primers          | —         |
| KIR3DL1_001R1200-2  | Exon 8   | GCAAGTGATCCAACGTCCG      |                                                                               | —         |
| KIR3D_Rev2          | Exon 3   | TTCCTGTGACCATGATCACCA    | PCR and sequencing <i>KIR3D</i> region                                        | —         |

Abbreviations: KIR, immunoglobulin-like receptor; SSP-PCR, sequence specific primer PCR.
